# Supplementary material
Source: PubMed Central journal article supplement (PMC6355612)
Supplement: 90e9fa8bc17e36ea88407d59030d90a9_AAC.02191-18-s0001.pdf [file 90e9fa8bc17e36ea88407d59030d90a9_AAC.02191-18-s0001.pdf]

## Supplemental Information for

Role of the Hydrophobic Bridge in the Carbapenemase Activity of Class D  $\beta$ -Lactamases

Nichole K. Stewart<sup>a</sup>, Clyde A. Smith<sup>b</sup>, Nuno T. Antunes<sup>a</sup>, Marta Toth<sup>a</sup>, Sergei B. Vakulenko<sup>a</sup>

<sup>a</sup>Department of Chemistry and Biochemistry, University of Notre Dame, Notre Dame, Indiana,  
USA

<sup>b</sup>Stanford Synchrotron Radiation Lightsource, Stanford University, Menlo Park, California, USA

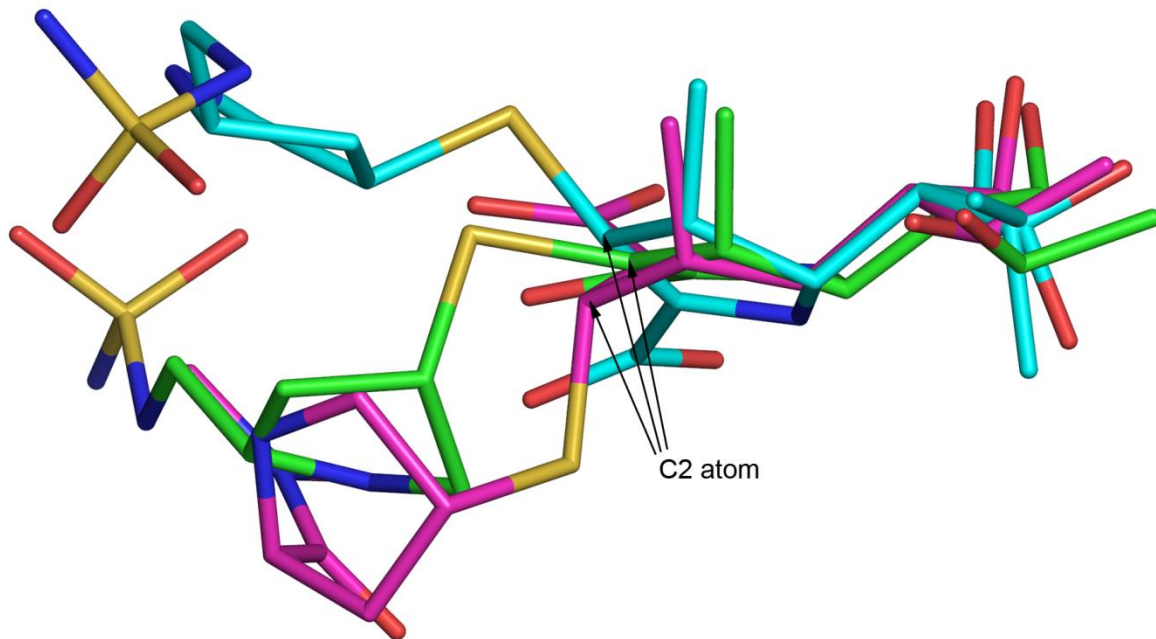

**FIGURE S1. Comparison of the three possible tautomers for a carbapenem.** The  $\Delta^2$  tautomer is derived from the structure of doripenem-OXA-24 (green sticks; PDB code 3PAE). The  $\Delta^1R$  isomer is derived from the doripenem-OXA-1 structure (cyan; PDB code 3ISG). The  $\Delta^1S$  isomer is derived from the meropenem-OXA-23 structure (magenta; PDB code 4JF4). The C2 atom is indicated for all three tautomers.

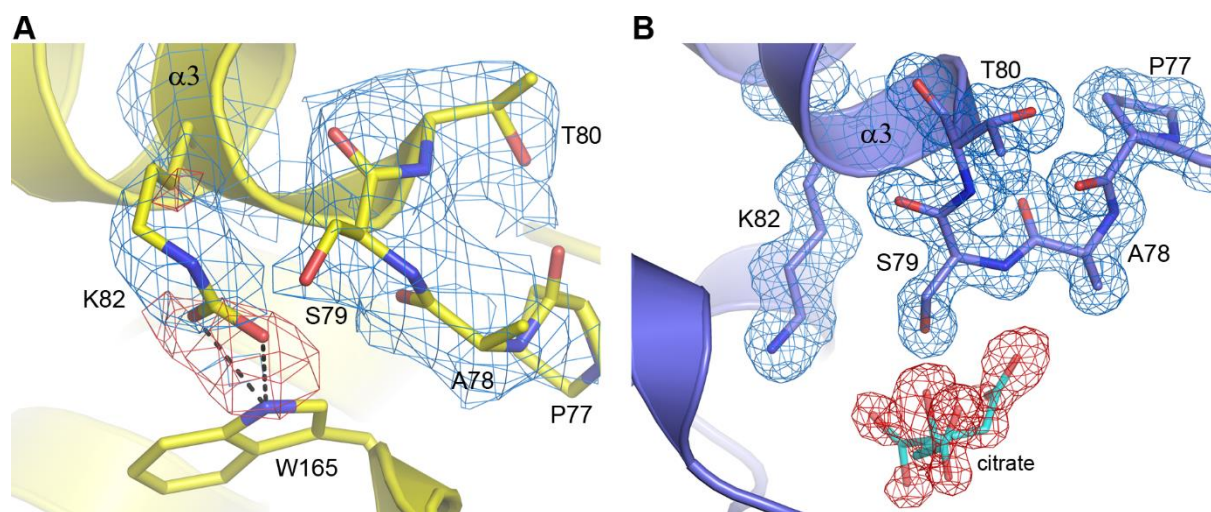

**FIGURE S2. Electron density for the F110A/M221A OXA-23 mutant structures.** (A) Final  $2F_o-F_c$  density (blue mesh,  $1.0 \sigma$ ) in the active site of the neutral pH apo structure. The catalytic residues (Ser79 and Lys82) are shown, along with residues neighboring the serine (Ala78 and Thr80). Residual  $F_o-F_c$  density calculated following molecular replacement is shown as a red mesh (contoured at  $2.75 \sigma$ ), indicating the presence of a carboxylate moiety on Lys82. The carboxylate group was omitted from the molecular replacement calculation, and the carboxylated Lys82 is shown here in its final refined position. The side chain of Trp165 from the  $\Omega$ -loop is involved in the stabilization of the carboxylated Lys82 via hydrogen bonding interactions (black dashed lines). (B) Final  $2F_o-F_c$  density (blue mesh,  $1.0 \sigma$ ) in the active site of the low pH apo structure. The catalytic residues (Ser79 and Lys82) are shown, along with residues neighboring the serine (Pro77, Ala78 and Thr80). No residual  $F_o-F_c$  density is observed at the end of the Lys82 side chain, indicating that the lysine residue is not modified by carboxylation. A large piece of residual  $F_o-F_c$  density near the catalytic serine was modeled as citrate (shown as semi-transparent cyan sticks from the final refined structure).

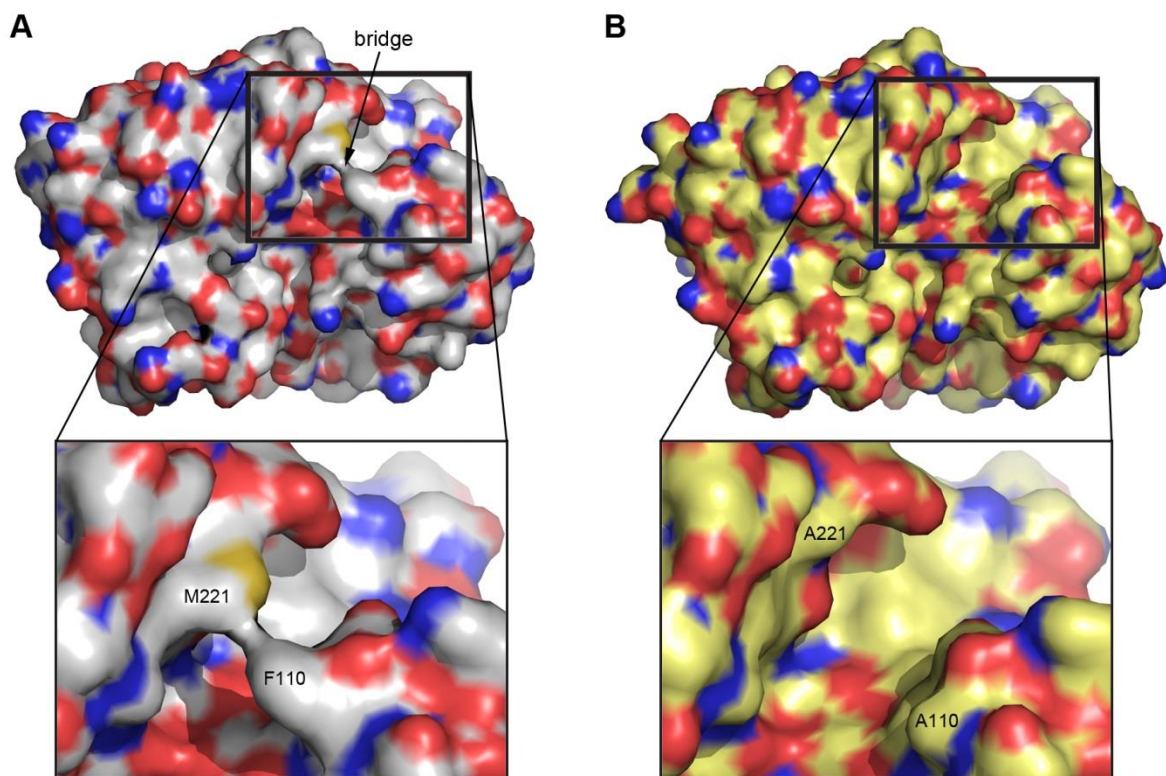

**FIGURE S3. Molecular surface representation of wild-type and mutant OXA-23.** (A) Molecular surface representation of wild-type OXA-23 showing the location of the hydrophobic bridge across the active site. The close up (lower panel) shows the location of Phe110 and Met221 of the bridge. (B) Molecular surface representation of the F110A/M221A OXA-23 mutant. The close up (lower panel) shows the location of Ala110 and Ala221.

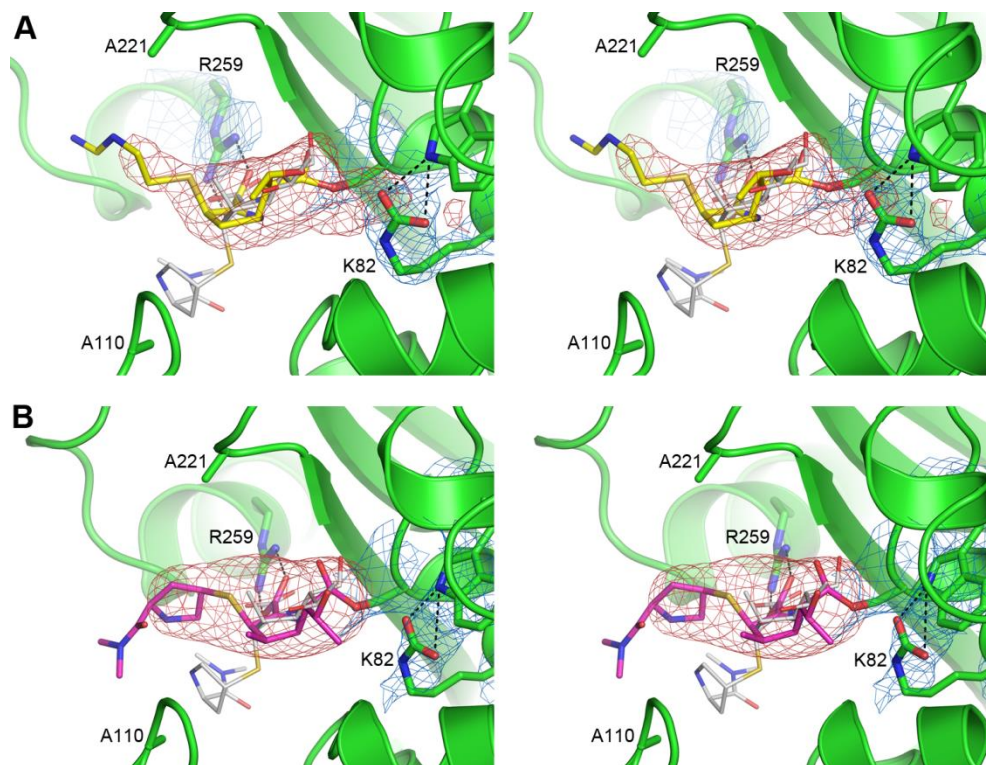

**FIGURE S4. Stereoviews of the electron density for the F110A/M221A OXA-23 neutral pH complexes.** (A) Two minute soak with imipenem, showing the residual  $F_o-F_c$  density (pink mesh,  $4.0 \sigma$ ) following molecular replacement. The refined F110A/M221A OXA-23 structure is shown as green cartoon and green sticks for the side chains of the catalytic residues (Ser79 and Lys82), the two mutated residues (Ala110 and Ala221), the arginine (Arg259) which interacts with the carboxylate of the bound substrate, and Trp165 (left side of the panel, no label) which hydrogen bonds to the carboxylated Lys82. Final  $2F_o-F_c$  density calculated is shown as a blue mesh (contoured at  $1.2 \sigma$ ) for Ser79, Lys82 and Arg259. The imipenem acyl-enzyme intermediate from the final refined model at  $3.1 \text{ \AA}$  resolution is shown in yellow in a  $\Delta^1R$  configuration. The  $\Delta^1S$  tautomer of meropenem bound to wild-type OXA-23 (PDB code 4JF4) is shown as thin gray sticks for comparison. (B) Two minute soak with meropenem, showing the residual  $F_o-F_c$  density (pink mesh,  $4.3 \sigma$ ) following molecular replacement. The refined F110A/M221A OXA-23 structure is shown as green cartoon and green sticks for the side chains of Ser79, Lys82, Ala110, Ala221, Arg259 and Trp165 (no label). Final  $2F_o-F_c$  density calculated is shown as a blue mesh (contoured at  $1.0 \sigma$ ) for Ser79 and Lys82. The meropenem acyl-enzyme intermediate from the final refined model at  $3.5 \text{ \AA}$  resolution is shown in magenta in a  $\Delta^1R$  configuration, and represents the best fit (compared to  $\Delta^1S$  and  $\Delta^2$  tautomers) to this residual density. The  $\Delta^1S$  tautomer of meropenem bound to wild-type OXA-23 (PDB code 4JF4) is shown as thin gray sticks for comparison.

**Table S1. Tautomeric conformations of class D  $\beta$ -lactamases**

| Enzyme    | Source               | Mutation    | Phe-Met Bridge   | Carbapenem | Tautomer      | PDB code | Reference |
|-----------|----------------------|-------------|------------------|------------|---------------|----------|-----------|
| OXA-1     | <i>E. coli</i>       | WT          | No               | doripenem  | $\Delta^1R$   | 3ISG     | (1)       |
| OXA-13    | <i>P. aeruginosa</i> | WT          | No <sup>a</sup>  | imipenem   | $\Delta^2$    | 1H5X     | not publ. |
| OXA-13    | <i>P. aeruginosa</i> | WT          | No <sup>a</sup>  | meropenem  | $\Delta^2$    | 1H8Y     | (2)       |
| OXA-23    | <i>A. baumannii</i>  | WT          | Yes              | meropenem  | $\Delta^1S$   | 4JF4     | (3)       |
| OXA-24/40 | <i>A. baumannii</i>  | V130D       | Yes              | doripenem  | $\Delta^2$    | 3PAG     | (4)       |
| OXA-24/40 | <i>A. baumannii</i>  | K84D        | Yes              | doripenem  | $\Delta^2$    | 3PAE     | (4)       |
| OXA-51    | <i>A. baumannii</i>  | I129L/K83D  | Yes <sup>b</sup> | doripenem  | $\Delta^2$    | 5L2F     | (5)       |
| OXA-239   | <i>A. baumannii</i>  | K82D        | Yes              | doripenem  | $\Delta^2$    | 5WI7     | (6)       |
| OXA-239   | <i>A. baumannii</i>  | K82D        | Yes              | imipenem   | $\Delta^1R^c$ | 5WIB     | (6)       |
| OXA-23    | <i>A. baumannii</i>  | F110A/M221A | No               | imipenem   | $\Delta^1R$   |          | this work |
| OXA-23    | <i>A. baumannii</i>  | F110A/M221A | No               | meropenem  | $\Delta^1R$   |          | this work |
| OXA-23    | <i>A. baumannii</i>  | F110A/M221A | No               | imipenem   | $\Delta^1R$   |          | this work |
| OXA-23    | <i>A. baumannii</i>  | F110A/M221A | No               | meropenem  | $\Delta^1R$   |          | this work |
| BPU-1     | <i>B. pumilus</i>    | WT          | No               | doripenem  | $\Delta^1R$   | 5CTN     | (7)       |

<sup>a</sup> Structure and sequence differences in the loop preceding the C-terminal helix alters the orientation of the Phe208 side chain which now occupies the Met221 position.

<sup>b</sup> The bridge residues are Phe111 and Trp222. The Trp222 side chain rotates by 180° to accommodate the doripenem (8).

<sup>c</sup> The imipenem has no tail (truncated at the sulfur).



**Table S2. Low pH form data collection statistics**

| <b>OXA-23 mutant low pH form</b>      |                                    |                                  |                                  |
|---------------------------------------|------------------------------------|----------------------------------|----------------------------------|
|                                       | <b>apo</b>                         | <b>meropenem</b>                 | <b>imipenem</b>                  |
| Space group                           | P2 <sub>1</sub> 2 <sub>1</sub> 2   | P2 <sub>1</sub> 2 <sub>1</sub> 2 | P2 <sub>1</sub> 2 <sub>1</sub> 2 |
| Unit cell, <i>a,b,c</i> (Å)           | 136.58, 43.99, 46.55               | 136.12, 44.01, 46.22             | 136.16, 44.20, 46.63             |
| Resolution (Å)                        | 38.5-1.25 (1.27-1.25) <sup>a</sup> | 38.2-1.55 (1.58-1.55)            | 38.5-1.55 (1.58-1.55)            |
| Reflections                           |                                    |                                  |                                  |
| - observed/unique                     | 996824 / 77596                     | 297149 / 41163                   | 294728 / 41640                   |
| <i>R</i> <sub>meas</sub> <sup>b</sup> | 6.7 (89.1)                         | 7.2 (107.8)                      | 6.2 (94.7)                       |
| <i>R</i> <sub>pim</sub> <sup>b</sup>  | 1.9 (24.6)                         | 2.6 (41.4)                       | 2.3 (35.9)                       |
| <i>I</i> / $\sigma I$                 | 14.7 (1.4)                         | 12.8 (1.6)                       | 17.4 (1.9)                       |
| Completeness (%)                      | 99.9 (94.7)                        | 99.8 (97.8)                      | 99.6 (97.8)                      |
| CC $\frac{1}{2}$ <sup>c</sup>         | 0.999 (0.887)                      | 0.998 (0.777)                    | 0.999 (0.862)                    |
| Average multiplicity                  | 12.8 (12.3)                        | 7.2 (6.4)                        | 7.1 (6.7)                        |
| Wilson B (Å <sup>2</sup> )            | 14.3                               | 21.4                             | 19.2                             |

<sup>a</sup> Numbers in parentheses refer to the highest resolution shell.

<sup>b</sup> *R*<sub>meas</sub> is the redundancy-independent merging R factor, and *R*<sub>pim</sub> is the precision-indicating merging R factor (9).

<sup>c</sup> Correlation between intensities from random half-sets of data (10).

**Table S3. Neutral pH form data collection statistics**

| <b>OXA-23 mutant neutral pH form</b> |                                    |                     |                       |
|--------------------------------------|------------------------------------|---------------------|-----------------------|
|                                      | <b>apo</b>                         | <b>meropenem</b>    | <b>imipenem</b>       |
| Space group                          | I422                               | I422                | I422                  |
| Unit cell, <i>a,c</i> (Å)            | 175.18, 79.22                      | 175.24, 81.18       | 174.88, 81.30         |
| Resolution (Å)                       | 39.2-3.25 (3.51-3.25) <sup>a</sup> | 39.2-3.5 (3.83-3.5) | 39.1-3.10 (3.31-3.10) |
| Reflections                          |                                    |                     |                       |
| - observed/unique                    | 93160 / 9985                       | 117920 / 8247       | 171217 / 11718        |
| $R_{\text{meas}}^{\text{b}}$         | 16.9 (92.1)                        | 26.2 (207.1)        | 18.9 (115.2)          |
| $R_{\text{pim}}^{\text{b}}$          | 5.7 (30.4)                         | 5.9 (54.9)          | 4.9 (29.1)            |
| $I / \sigma I$                       | 9.8 (2.4)                          | 9.4 (1.5)           | 10.8 (2.3)            |
| Completeness (%)                     | 99.8 (99.7)                        | 99.9 (99.9)         | 99.9 (99.7)           |
| CC $_{1/2}^{\text{c}}$               | 0.997 (0.885)                      | 0.993 (0.900)       | 0.995 (0.904)         |
| Average multiplicity                 | 9,3 (8.9)                          | 14.3 (13.9)         | 7.8 (8.0)             |
| Wilson B (Å <sup>2</sup> )           | 79.9                               | 83.5                | 86.9                  |

<sup>a</sup> Numbers in parentheses refer to the highest resolution shell.

<sup>b</sup>  $R_{\text{meas}}$  is the redundancy-independent merging R factor, and  $R_{\text{pim}}$  is the precision-indicating merging R factor (9).

<sup>c</sup> Correlation between intensities from random half-sets of data (10).



**Table S4. Low pH structure refinement statistics**

|                                                  | <b>OXA-23 mutant low pH form</b> |                  |                 |
|--------------------------------------------------|----------------------------------|------------------|-----------------|
|                                                  | <b>apo</b>                       | <b>meropenem</b> | <b>imipenem</b> |
| pH                                               | 4.1                              | 4.6              | 4.6             |
| Resolution (Å)                                   | 38.47 – 1.25                     | 37.0 – 1.55      | 37.1 – 1.55     |
| Reflections used, work / free                    | 73880 / 3762                     | 39038 / 2093     | 39486 / 2126    |
| $R_{\text{work}} / R_{\text{free}}$ <sup>a</sup> | 0.1543 / 0.1799                  | 0.1722 / 0.1917  | 0.1767 / 0.1962 |
| Number of atoms                                  |                                  |                  |                 |
| - protein                                        | 1881                             | 1819             | 1890            |
| - ligand/ions                                    | 13 (citrate)                     | 26 (meropenem)   | 20 (imipenem)   |
| - water                                          | 262                              | 168              | 210             |
| <i>B</i> -factors (Å <sup>2</sup> )              |                                  |                  |                 |
| - protein                                        | 21.4                             | 25.0             | 23.2            |
| - ligand                                         | 24.1                             | 35.6             | 30.0            |
| - water                                          | 36.0                             | 37.1             | 35.6            |
| <i>rms</i> deviations                            |                                  |                  |                 |
| - bond lengths (Å)                               | 0.005                            | 0.006            | 0.006           |
| - bond angles (°)                                | 1.15                             | 0.975            | 0.916           |
| Ramachandran plot <sup>b</sup>                   |                                  |                  |                 |
| - residues in favored regions (%)                | 98.2                             | 97.3             | 96.7            |
| - number of outliers                             | 1                                | 1                | 0               |
| Molprobity score <sup>b</sup>                    | 1.13                             | 1.24             | 1.70            |

<sup>a</sup>  $R_{\text{free}}$  was calculated using a test set comprising 5% of the data.

<sup>b</sup> Calculated with the program MOLPROBITY (11).

**Table S5. Neutral pH structure refinement statistics**

|                                                | <b>OXA-23 mutant neutral pH form</b> |                  |                 |
|------------------------------------------------|--------------------------------------|------------------|-----------------|
|                                                | <b>apo</b>                           | <b>meropenem</b> | <b>imipenem</b> |
| Resolution (Å)                                 | 39.2 – 3.25                          | 39.2 – 3.50      | 39.1 – 3.10     |
| Reflections used, work / free                  | 9480 / 484                           | 7147 / 385       | 11708 / 570     |
| $R_{\text{work}} / R_{\text{free}}^{\text{a}}$ | 0.2450 / 0.2903                      | 0.2339 / 0.2998  | 0.1902 / 0.2162 |
| Number of atoms                                |                                      |                  |                 |
| - protein                                      | 1899                                 | 1896             | 1908            |
| - ligand/ions                                  | -                                    | 26 (meropenem)   | 25 (imipenem)   |
| $B$ -factors (Å <sup>2</sup> )                 |                                      |                  |                 |
| - protein                                      | 94.2                                 | 130.8            | 95.1            |
| - ligand                                       | -                                    | 136.9            | 103.3cd ./      |
| <i>rms</i> deviations                          |                                      |                  |                 |
| - bond lengths (Å)                             | 0.010                                | 0.003            | 0.009           |
| - bond angles (°)                              | 1.10                                 | 0.700            | 1.10            |
| Ramachandran plot <sup>b</sup>                 |                                      |                  |                 |
| - residues in favored regions (%)              | 89.4                                 | 95.7             | 93.2            |
| - number of outliers                           | 3                                    | 0                | 1               |
| Molprobity score <sup>b</sup>                  | 3.27                                 | 1.95             | 2.39            |

<sup>a</sup>  $R_{\text{free}}$  was calculated using a test set comprising 5% of the data.

<sup>b</sup> Calculated with the program MOLPROBITY (11).

## References

1. Schneider KD, Karpen ME, Bonomo RA, Leonard DA, Powers RA. 2009. The 1.4 Å crystal structure of the class D β-lactamase OXA-1 complexed with doripenem. *Biochemistry* 48:11840-11847.
2. Pernot L, Frénois F, Rybkine T, L'Hermite G, Petrella S, Delettré J, Jarlier V, Collatz E, Sougakoff W. 2001. Crystal structures of the class D β-lactamase OXA-13 in the native form and in complex with meropenem. *J Mol Biol* 310:859-874.
3. Smith CA, Antunes NT, Stewart NK, Toth M, Kumarasiri M, Chang M, Mobashery S, Vakulenko SB. 2013. Structural basis for carbapenemase activity of the OXA-23 β-lactamase from *Acinetobacter baumannii*. *Chem Biol* 20:1107-1115.
4. Schneider KD, Ortega CJ, Renck NA, Bonomo RA, Powers RA, Leonard DA. 2011. Structures of the class D carbapenemase OXA-24 from *Acinetobacter baumannii* in complex with doripenem. *J Mol Biol* 406:583-594.
5. June CM, Muckenthaler TJ, Schroder EC, Klamer ZL, Wawrzak Z, Powers RA, Szarecka A, Leonard DA. 2016. The structure of a doripenem-bound OXA-51 class D β-lactamase variant with enhanced carbapenemase activity. *Protein Sci* 25:2152-2163.
6. Harper TM, June CM, Taracila MA, Bonomo RA, Powers RA, Leonard DA. 2018. Multiple substitutions lead to increased loop flexibility and expanded specificity in *Acinetobacter baumannii* carbapenemase OXA-239. *Biochem J* 475:273-288.
7. Toth M, Antunes NT, Stewart NK, Frase H, Bhattacharya M, Smith CA, Vakulenko SB. 2016. Class D β-lactamases do exist in Gram-positive bacteria. *Nat Chem Biol* 12:9-14.
8. Smith CA, Antunes NT, Stewart NK, Frase H, Toth M, Kantardjieff KA, Vakulenko S. 2015. Structural basis for enhancement of carbapenemase activity in the OXA-51 family of class D β-lactamases. *ACS Chem Biol* 10:1791-1796.
9. Weiss MS. 2001. Global indicators of X-ray data quality. *J Appl Crystallogr* 34:130-135.
10. Karplus PA, Diederichs K. 2012. Linking crystallographic model and data quality. *Science* 336:1030-1033.
11. Chen VB, Arendall WB, Headd JJ, Keedy DA, Immormino RM, Kapral GJ, Murray LW, Richardson JS, Richardson DC. 2010. MolProbity: All-atom structure validation for macromolecular crystallography. *Acta Crystallogr D* 66:12-21.
